# Supplementary material
Source: ML conference proceedings conference paper supplement (https://proceedings.neurips.cc/paper_files/paper/2023/hash/8b94879b177d9780c17f5a78f62a6a8a-Abstract.html)
Supplement: Supplementary file 1 [file 8b94879b177d9780c17f5a78f62a6a8a-Supplemental-Datasets_and_Benchmarks.pdf]

# DataDemo-Paper

May 26, 2023

```
[1]: import os
import json
import pickle
import numpy as np
import sys
sys.path.append("./code")
import util
import matplotlib.pyplot as plt
%matplotlib inline

path = '<dataset path>'
corpus = '<Corpus Path>'
design = 'design_n'
```

## Show data folder structure

```
[2]: data_files = os.listdir(os.path.join(path,design))
print(data_files)
```

```
['design_seq.json', 'design_tree.json', 'design_low_level.json', 'Geom.stp',
'cadfile.stl', 'trims.npy', 'output.json', 'pointCloud.npy']
```

## Show design tree

```
[3]: tree = open(os.path.join(os.path.join(path,design), 'design_tree.json'))
tree_json = json.load(tree)
tree_json_print = json.dumps(tree_json, indent=4)
tree.close()
print(tree_json_print)
```

```
{
  "generator_version": "UAV2_gen12",
  "name": "design_12028_e437c0c4835841a99d48808aa8734bc7_s",
  "hub": {
    "node_type": "ConnectedHub4_Sym",
    "mainSegment": {
      "node_type": "PropArm",
      "armLength": 413.5996130739701,
      "motor": {
```

```

        "motorType": "t_motor_AT3530KV580"
    },
    "prop": {
        "propType": "apc_propellers_18x8"
    },
    "flange": {
        "offset": 41.65045980035022,
        "angle": 0.0
    }
}
},
"fuselageWithComponents": {
    "node_type": "SingleBatteryFuselageWithComponents",
    "battery": {
        "batteryType": "TurnigyGraphene2200mAh3S75C"
    },
    "fuselage": {
        "length": 106.0,
        "vertDiameter": 52.5,
        "horzDiameter": 332.4,
        "floorHeight": 8.75,
        "batteryX": 0.0,
        "batteryY": 6.0,
        "rpmX": 0.0,
        "rpmY": -100.8,
        "autoPilotX": 0.0,
        "autoPilotY": 44.5,
        "currentX": 0.0,
        "currentY": -80.65,
        "voltageX": 0.0,
        "voltageY": 98.3,
        "gpsX": 0.0,
        "gpsY": -40.5,
        "varioX": 0.0,
        "varioY": 76.65
    }
}
}
}

```

## Design Corpus

- One can use the design corpus to add context to the component types. For example, here is a print out of the attributes of a single battery.

```

[4]: corpus_file = open(corpus, "rb")
     corpus_dic = pickle.load(corpus_file)
     corpus_file.close()
     print(corpus_dic.keys())

```

```

print('\nBattery Example:\n')
print('Number of batteries: ', len(corpus_dic['Battery'].keys()))
print('Battery example: TurnigyGraphene2200mAh3S75C:\n')
for key, value in corpus_dic['Battery']['TurnigyGraphene2200mAh3S75C'].items():
    print('{:20s}: {}'.format(key, value))

```

```

dict_keys(['Servo', 'GPS', 'ESC', 'Wing', 'Sensor', 'Propeller', 'Receiver',
'Motor', 'Battery', 'Autopilot'])

```

Battery Example:

Number of batteries: 36

Battery example: TurnigyGraphene2200mAh3S75C:

```

CAPACITY           : 2200.0
CONT_DISCHARGE_RATE : 75.0
COST                : 32.73
LENGTH             : 106.0
PEAK_DISCHARGE_RATE : 150.0
THICKNESS          : 31.0
VOLTAGE             : 11.1
WEIGHT              : 0.23
WIDTH               : 35.0

```

## Design Sequence

- As described in the paper, we convert the design tree into a design sequence which we find to be useful for sequence based machine learning approaches.
- Here we show an example sequence that corresponds to the tree above.

```

[5]: seq = open(os.path.join(os.path.join(path, design), 'design_seq.json'))
seq_json = json.load(seq)
seq_json_print = json.dumps(seq_json, indent=4)
seq.close()
print(seq_json_print)

```

```

[
  {
    "generator_version": "UAV2_gen12"
  },
  {
    "name": "design_12028_e437c0c4835841a99d48808aa8734bc7_s"
  },
  {
    "node_type": "ConnectedHub4_Sym"
  },
  {
    "node_type": "PropArm"
  }
]

```

```

},
{
  "armLength": 413.5996130739701
},
{
  "motorType": "t_motor_AT3530KV580"
},
{
  "propType": "apc_propellers_18x8"
},
{
  "offset": 41.65045980035022
},
{
  "angle": 0.0
},
{
  "node_type": "SingleBatteryFuselageWithComponents"
},
{
  "batteryType": "TurnigyGraphene2200mAh3S75C"
},
{
  "length": 106.0
},
{
  "vertDiameter": 52.5
},
{
  "horzDiameter": 332.4
},
{
  "floorHeight": 8.75
},
{
  "batteryX": 0.0
},
{
  "batteryY": 6.0
},
{
  "rpmX": 0.0
},
{
  "rpmY": -100.8
},
{
  "autoPilotX": 0.0

```

```
    },
    {
      "autoPilotY": 44.5
    },
    {
      "currentX": 0.0
    },
    {
      "currentY": -80.65
    },
    {
      "voltageX": 0.0
    },
    {
      "voltageY": 98.3
    },
    {
      "gpsX": 0.0
    },
    {
      "gpsY": -40.5
    },
    {
      "varioX": 0.0
    },
    {
      "varioY": 76.65
    }
  ]
```

### 0.0.1 STL plot

```
[6]: util.plot_stl(path, design)
```

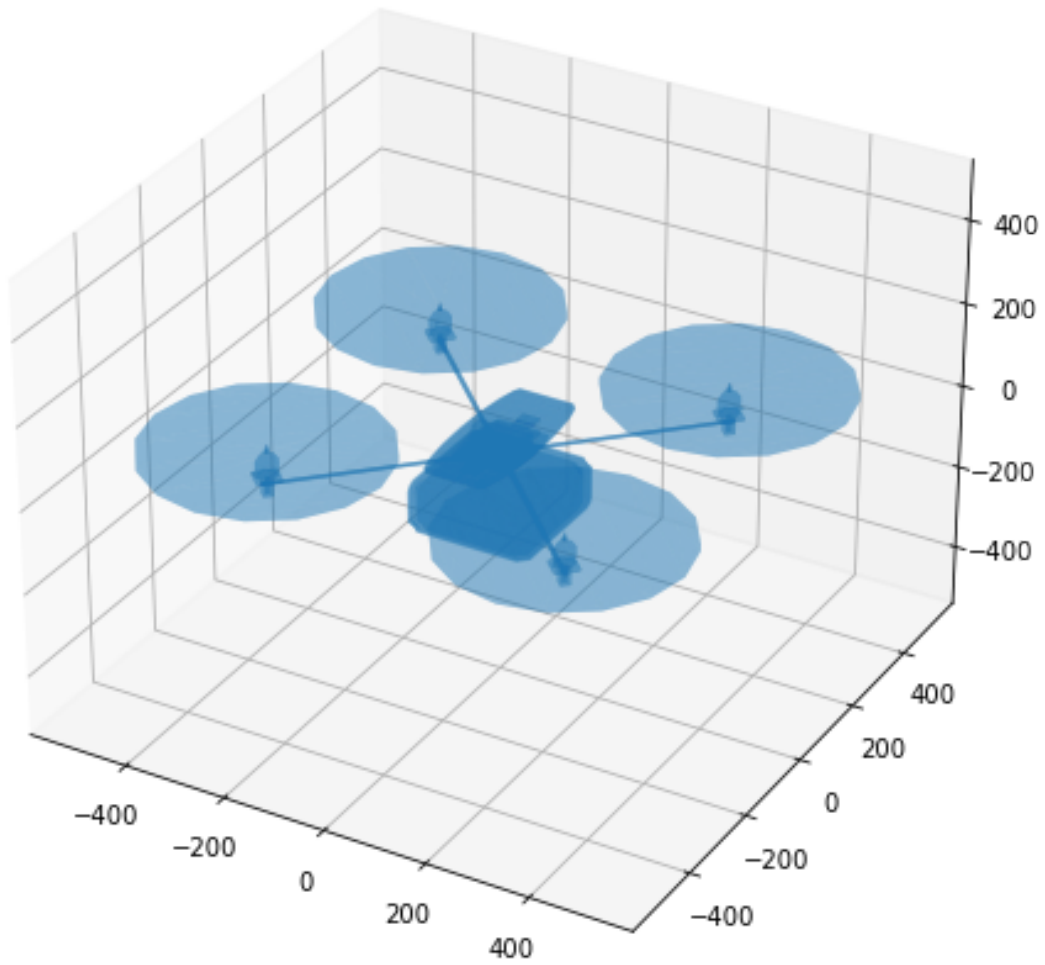

## 0.0.2 Point Cloud

- One can easily convert the STL file into a point cloud... Here is one we made earlier and have included in the data set.

```
[7]: util.plot_pointCloud(path, design)
```

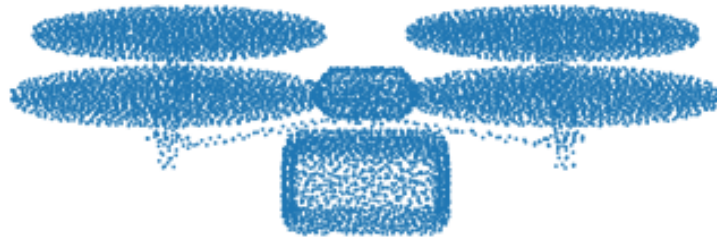

### 0.0.3 Output File

```
[8]: seq = open(os.path.join(os.path.join(path,design), 'output.json'))
seq_json = json.load(seq)
seq_json_print = json.dumps(seq_json, indent=4)
seq.close()
print(seq_json_print)
```

```
{
  "Interferences": 2,
  "Mass": 3.4330805367769828,
  "Batt_amps_ratio_MFD": 0.72659409,
  "Batt_amps_ratio_MxSpd": 0.906760275,
```

```

    "Distance_MxSpd": 1228.10852,
    "Max_Distance": 1268.38354,
    "Hover_Time": 83.8901367,
    "Max_Speed": 29.0,
    "Max_uc_at_MFD": 0.738918006,
    "Mot_amps_ratio_MFD": 0.602965593,
    "Mot_amps_ratio_MxSpd": 0.807905734,
    "Mot_power_ratio_MFD": 0.310742617,
    "Mot_power_ratio_MxSpd": 0.416359991,
    "Power_MFD": 872.750122,
    "Power_MxSpd": 1350.86023,
    "Speed_MFD": 24.0
}

```

#### 0.0.4 Plot the trims for the UAV design

```

[9]: trims = np.load(os.path.join(os.path.join(path,design), 'trims.npy'))
names = ['distance',
         'flight_time',
         'pitch_angle',
         'max_uc',
         'thrust',
         'lift',
         'drag',
         'current',
         'total_power',
         'frac_amp',
         'frac_pow',
         'frac_current']
plt = util.plot_trim_stats(trims, names, fs = 19, figsize = (23,2.))
plt.show()

```

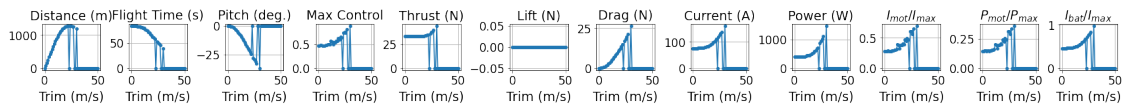



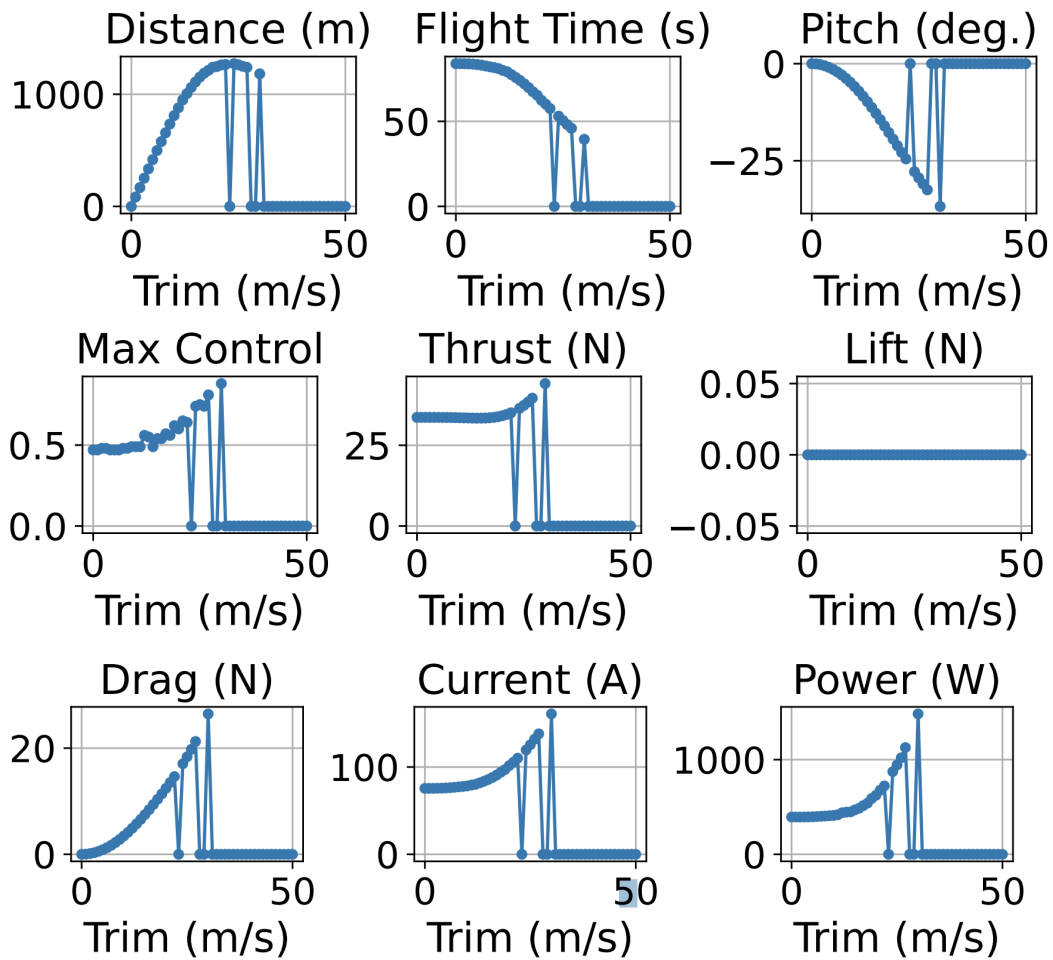

Figure 7: Analysis of trims corresponding to different velocities from 0 to 50 m/s
